# Supplementary material for: Quantifying overlapping and differing information of global precipitation for GCM forecasts and El Niño–Southern Oscillation
Source: Copernicus journal article supplement (doi:10.5194/hess-2022-58), 2022-03-01
Supplement: Supplementary file 1 [file hess-2022-58-supplement.pdf]

Supporting Information for

# **Quantifying overlapping and differing information of global precipitation for GCM forecasts and El Niño–Southern Oscillation**

Tongtiegang Zhao<sup>1</sup>, Haoling Chen<sup>1</sup>, Yu Tian<sup>2</sup> and Xiaohong Chen<sup>1</sup>

<sup>1</sup> Center of Water Resources and Environment, Southern Marine Science and Engineering Guangdong Laboratory (Zhuhai), School of Civil Engineering, Sun Yat-Sen University, Guangzhou, China

<sup>2</sup> Department of Water Resources, China Institute of Water Resources and Hydropower Research, Beijing, China

*Correspondence to:* Tongtiegang Zhao ([zhaottg@mail.sysu.edu.cn](mailto:zhaottg@mail.sysu.edu.cn))

## **Contents of this file**

Figures S1 to S8 illustrating the eight patterns of overlapping and differing information by season

Figures S9 to S12 illustrating the eight patterns at the lead times of 1 month and 2 months

Figures S13 to S16 illustrating the eight patterns under the significance levels of 0.05 and 0.01

Figures S17 to S18 illustrating the eight patterns for the Indian Ocean Dipole (IOD) in December-January-February

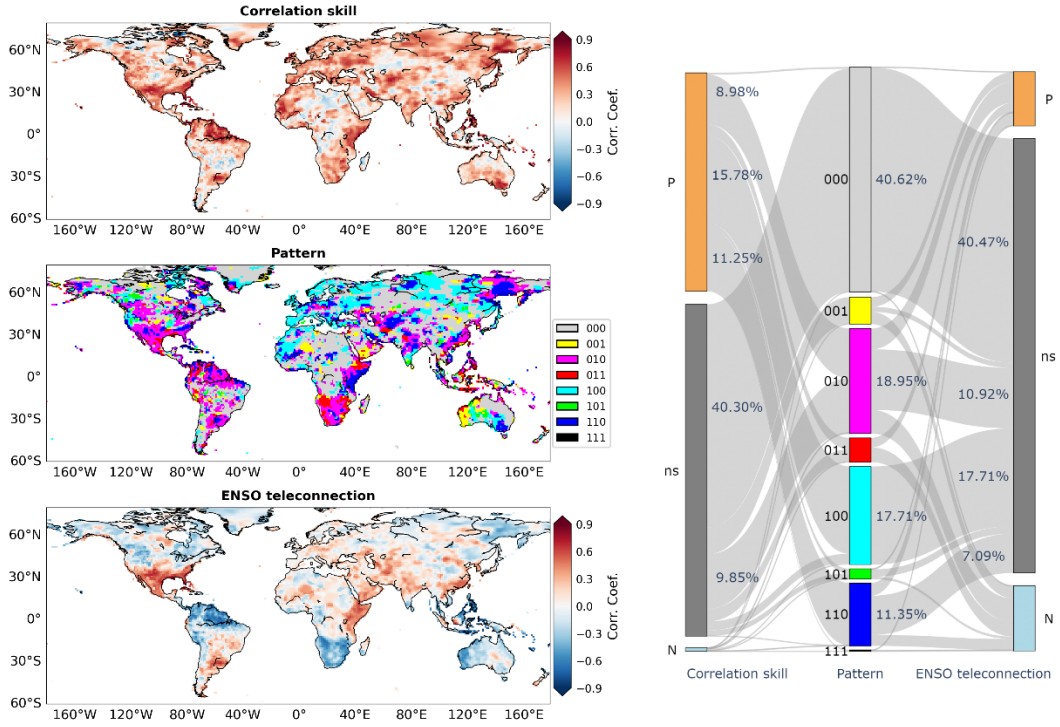

**Figure S1. Spatial distribution of the eight patterns of overlapping and differing information in December-January-February (DJF). The significance level is set as 0.10 and the correlation skill is for the CFSv2 forecasts at the lead time of 0 month**

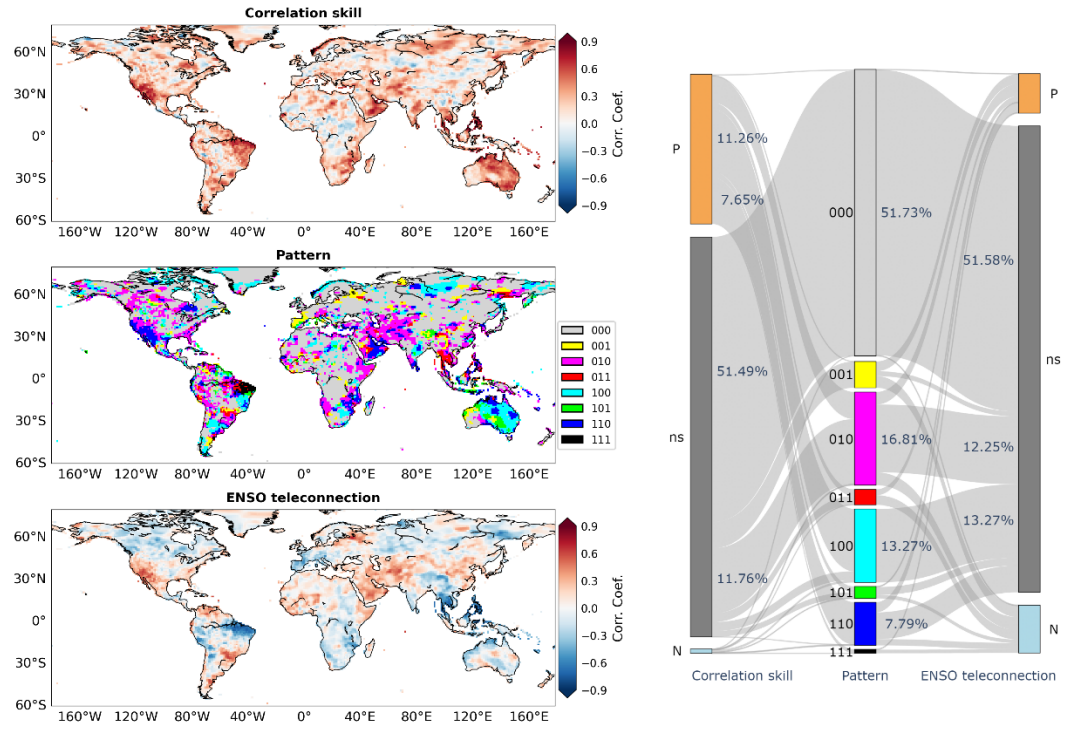

**Figure S2. As for Figure S1, but for March-April-May (MAM)**

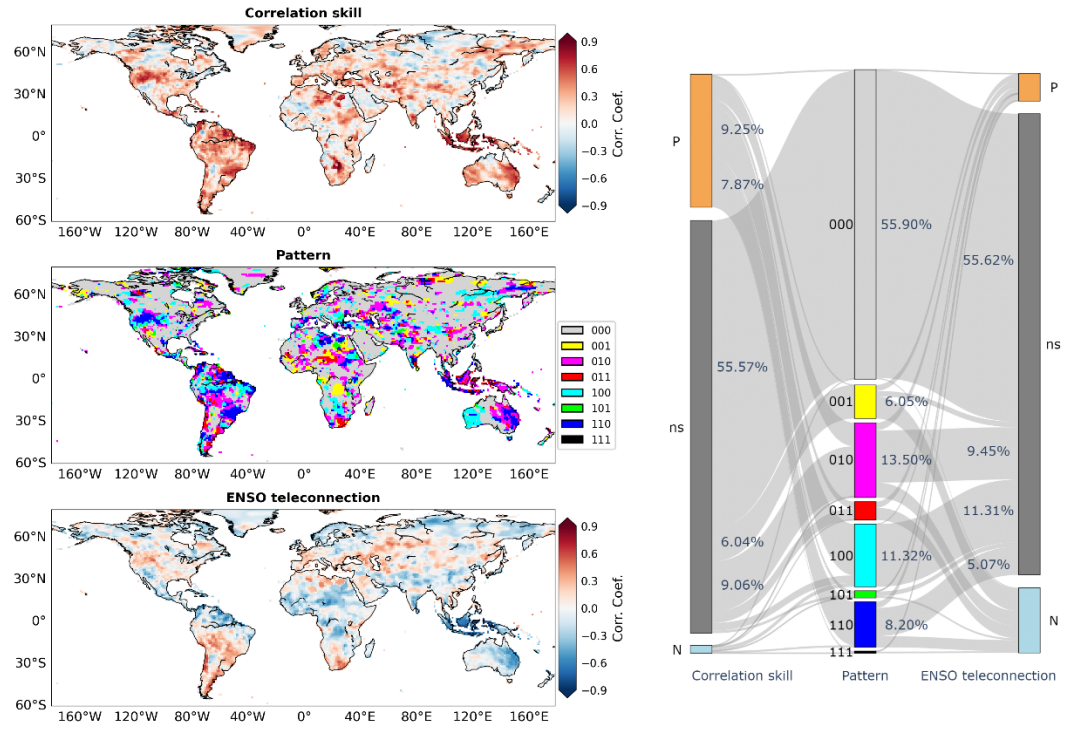

**Figure S3. As for Figure S1, but for June-July-August (JJA)**

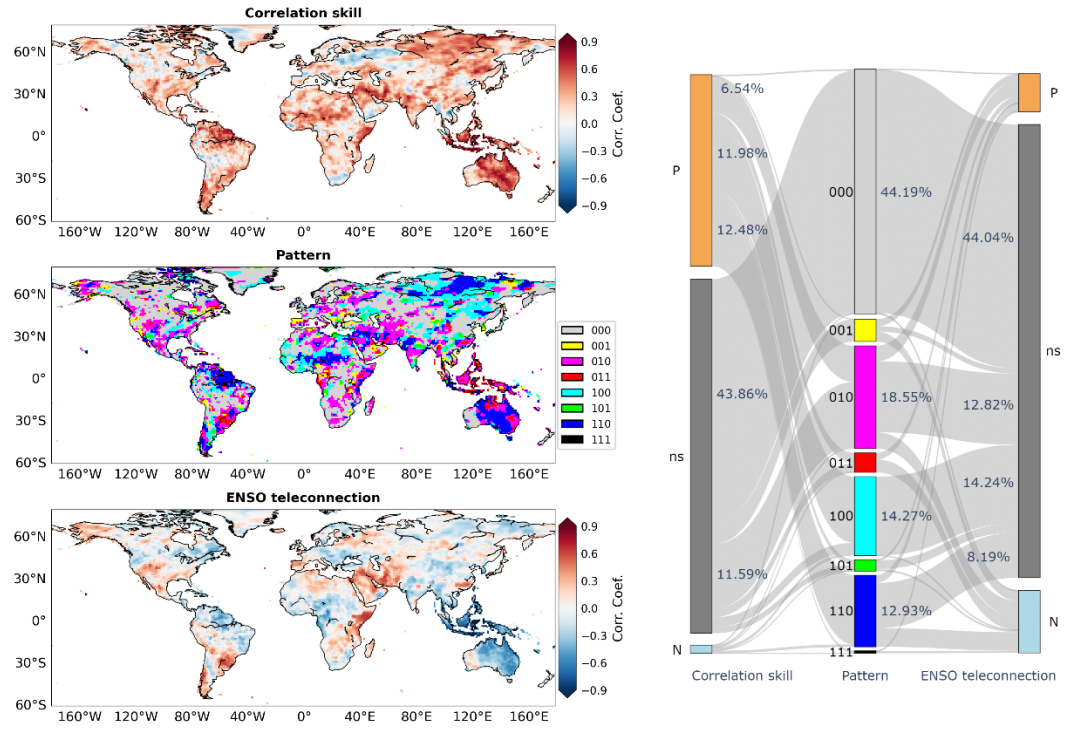

**Figure S4. As for Figure S1, but for September-October-November (SON)**

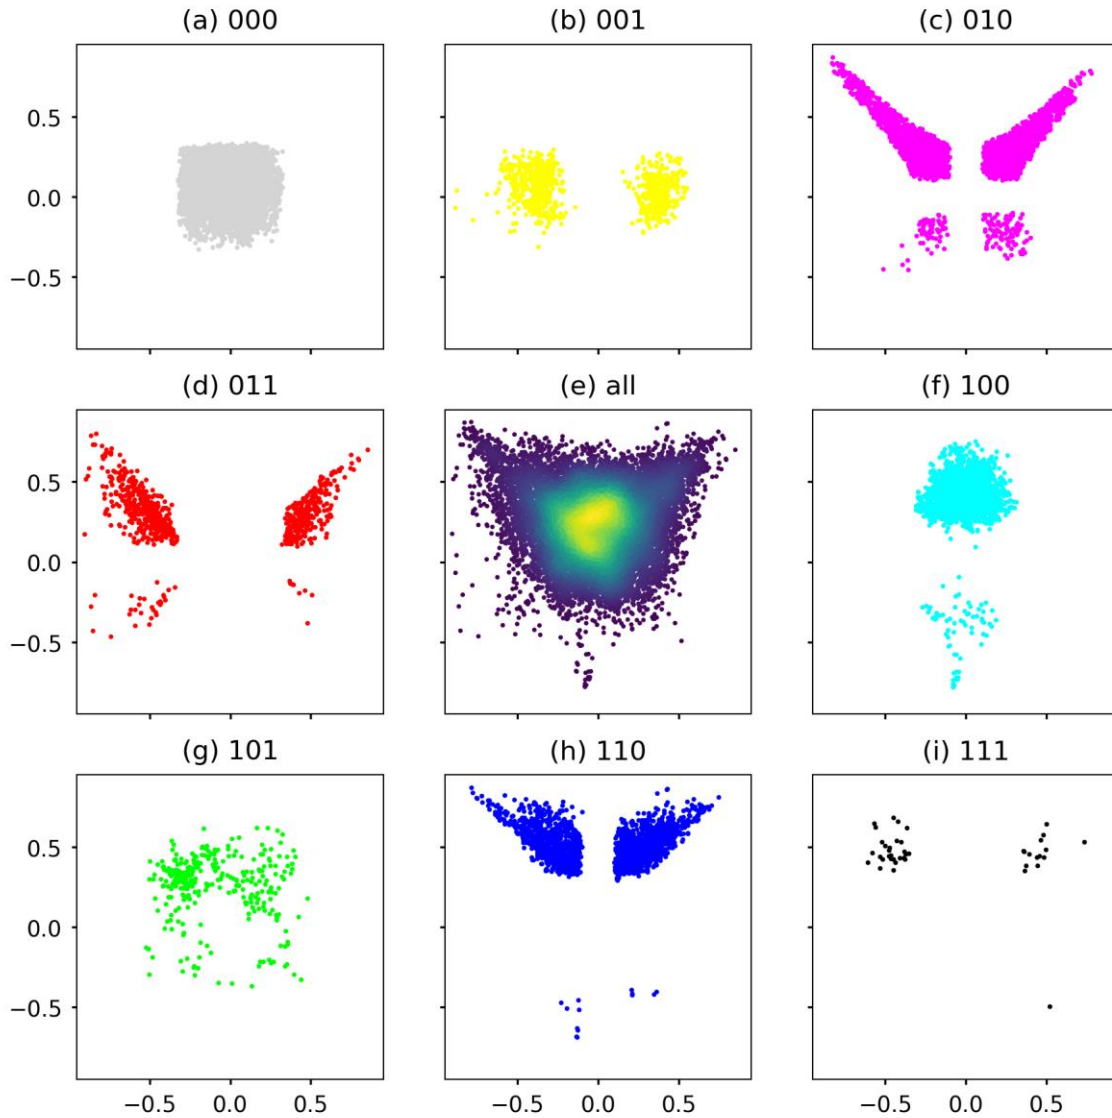

**Figure S5. Scatter plots of correlation skill against ENSO teleconnection under the eight patterns in December-January-February (DJF). The significance level is set as 0.10 and the correlation skill is for the CFSv2 forecasts at the lead time of 0 month**

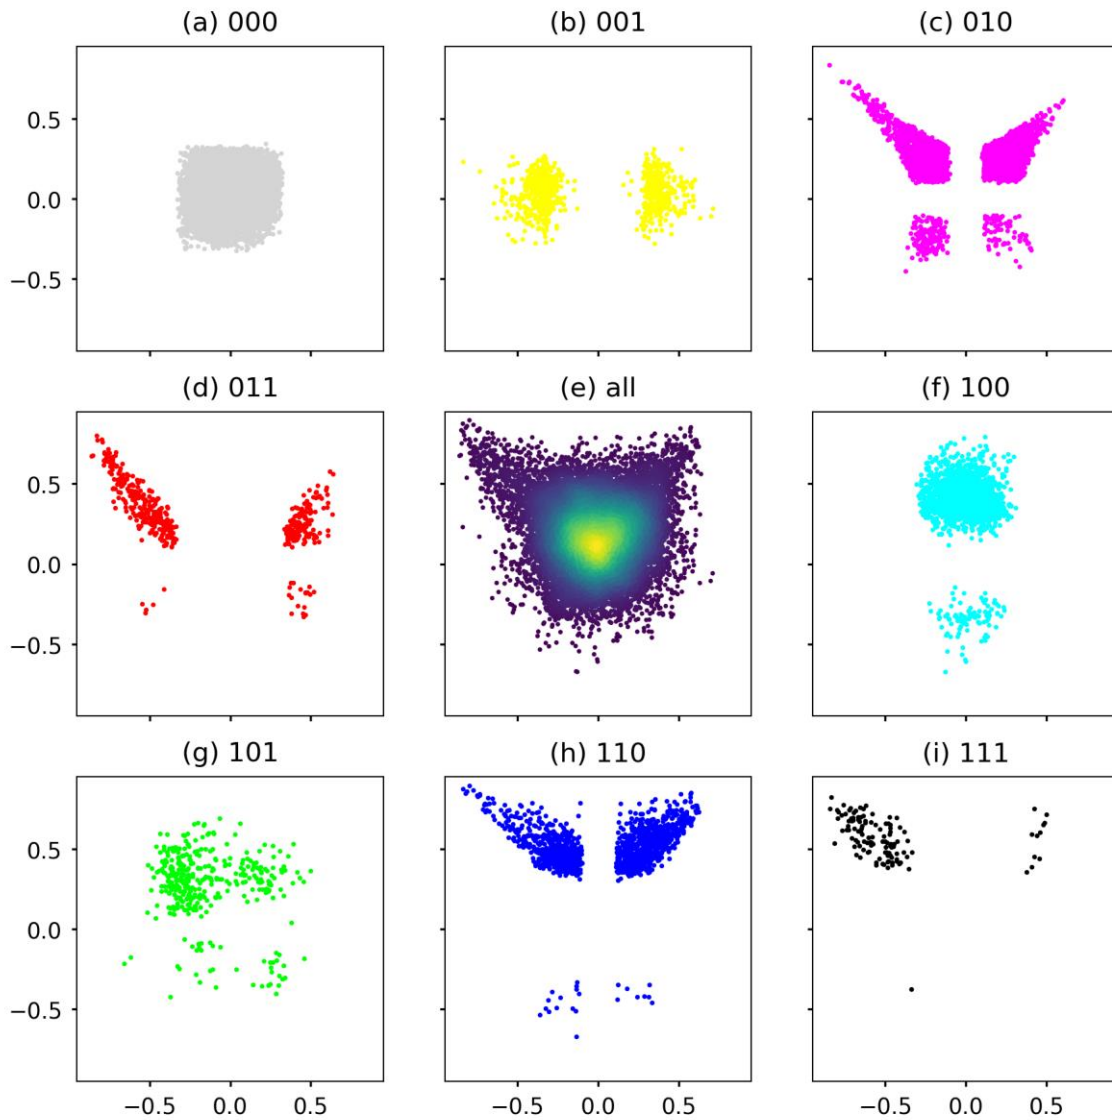

**Figure S6. As for Figure S5, but for March-April-May (MAM)**

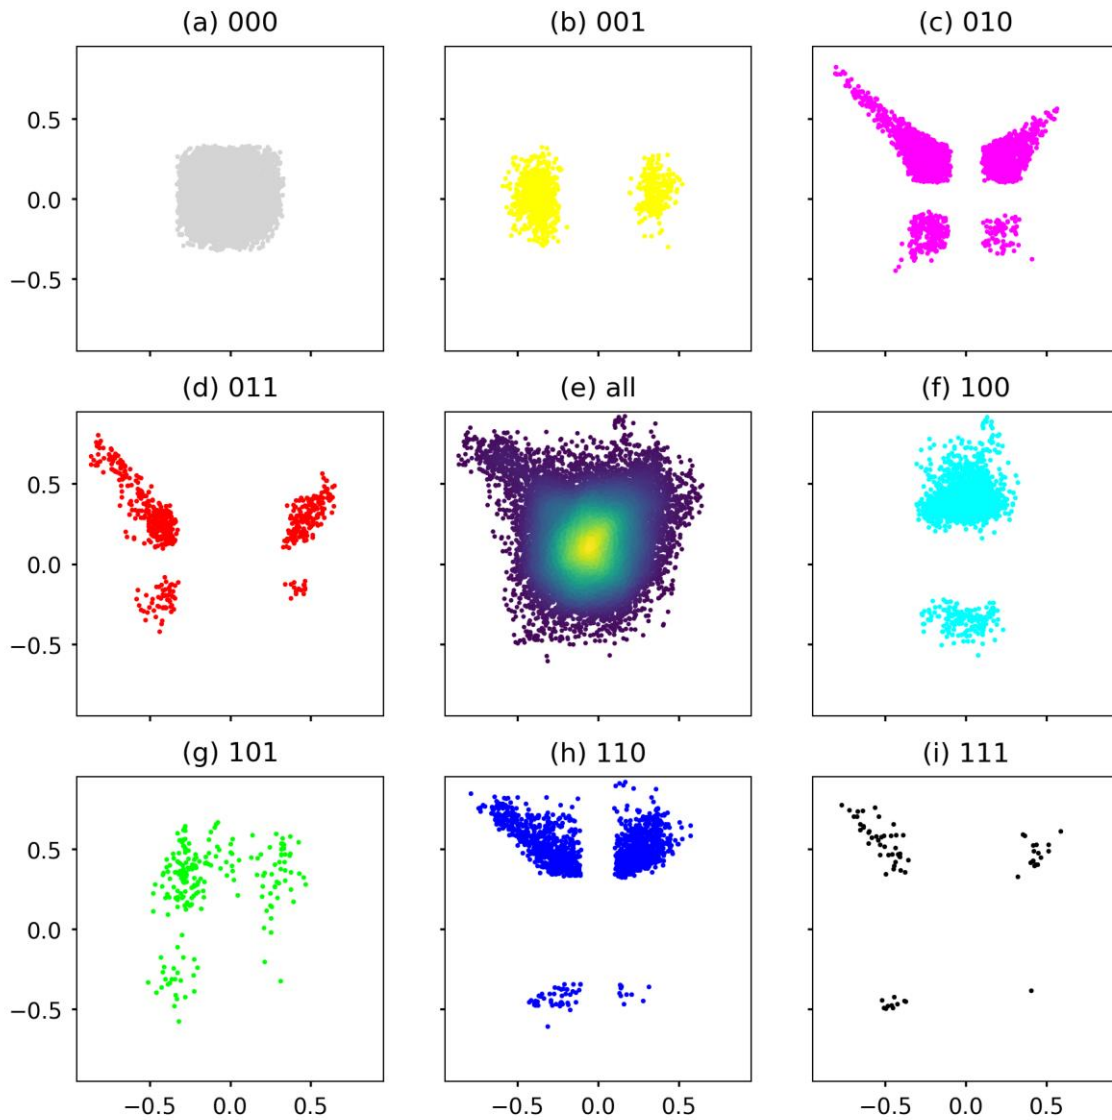

**Figure S7. As for Figure S5, but for June-July-August (JJA)**



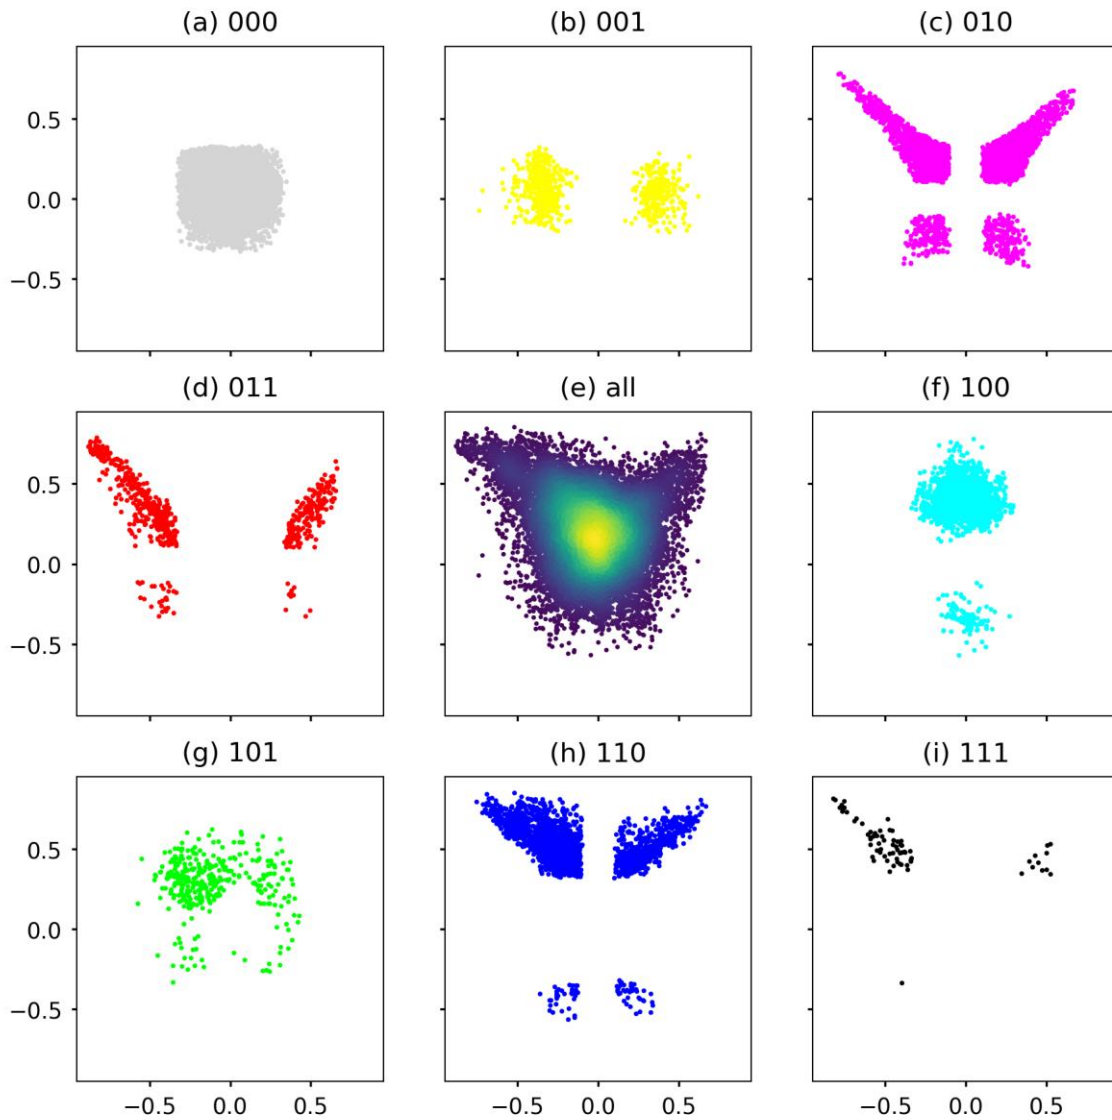

**Figure S8. As for Figure S5, but for September-October-November (SON)**

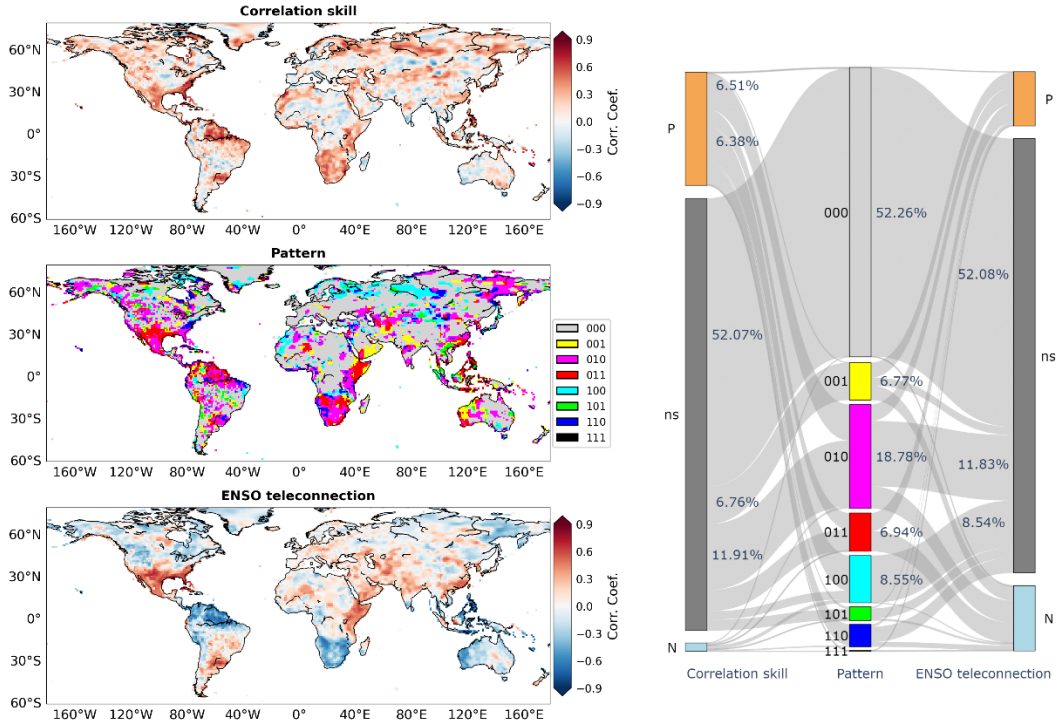

Figure S9. As for Figure S1, but for CFSv2 forecasts at the lead time of 1 month

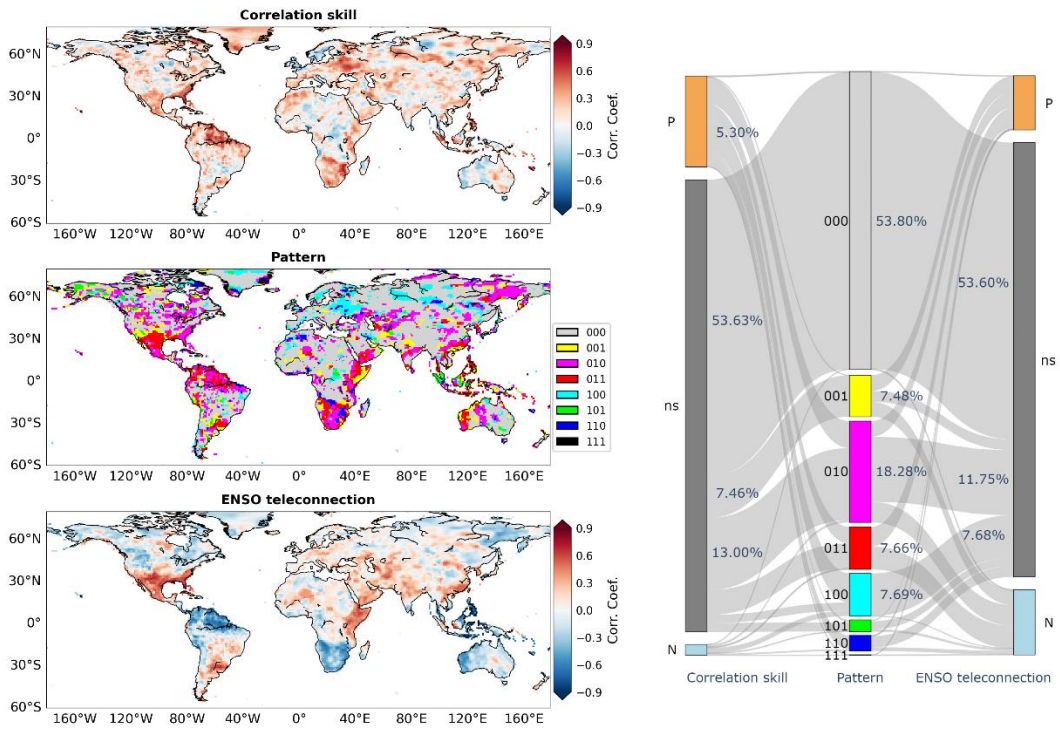

Figure S10. As for Figure S1, but for CFSv2 forecasts at the lead time of 2 months

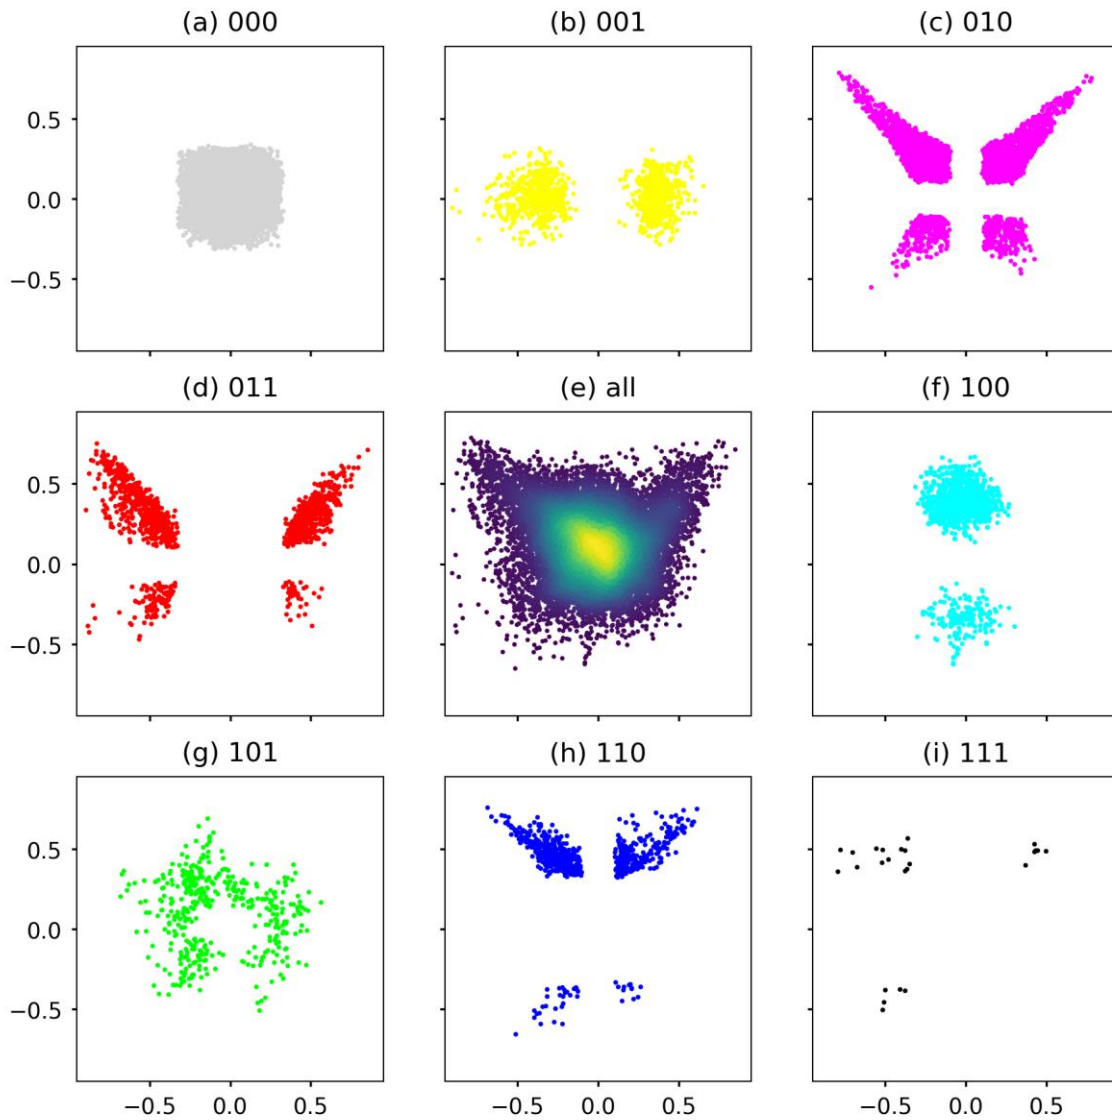

**Figure S11. As for Figure S5, but for CFSv2 forecasts at the lead time of 1 month**

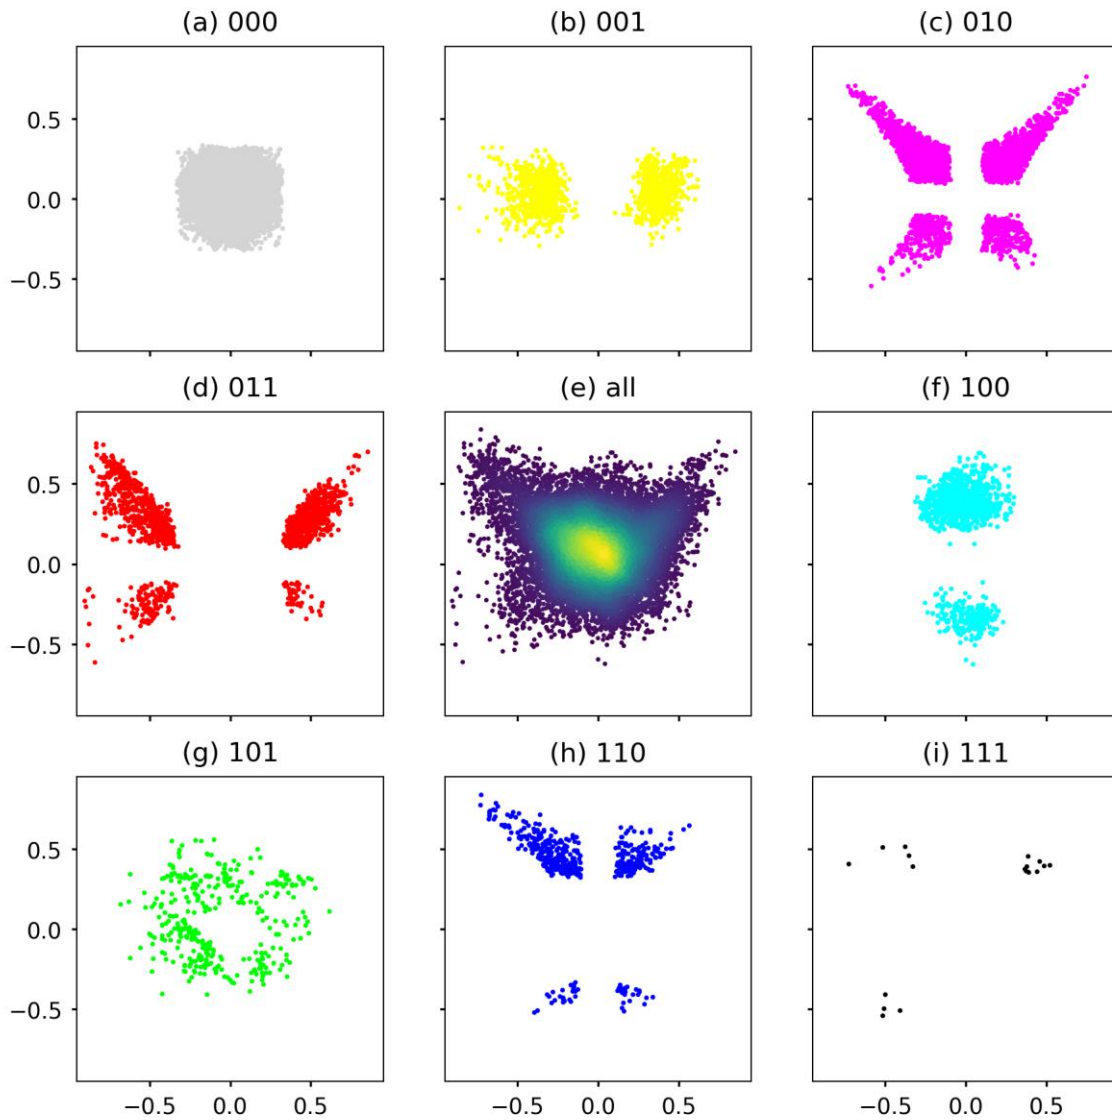

**Figure S12. As for Figure S5, but for CFSv2 forecasts at the lead time of 2 months**

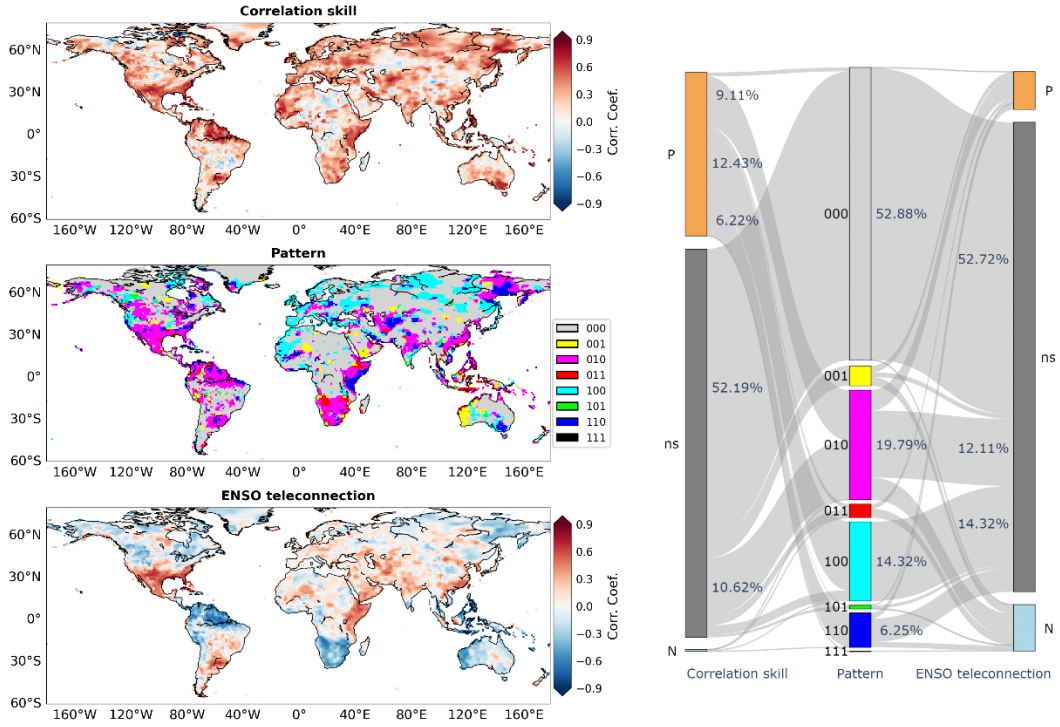

**Figure S13.** As for Figure S1, but for the significance level of 0.05

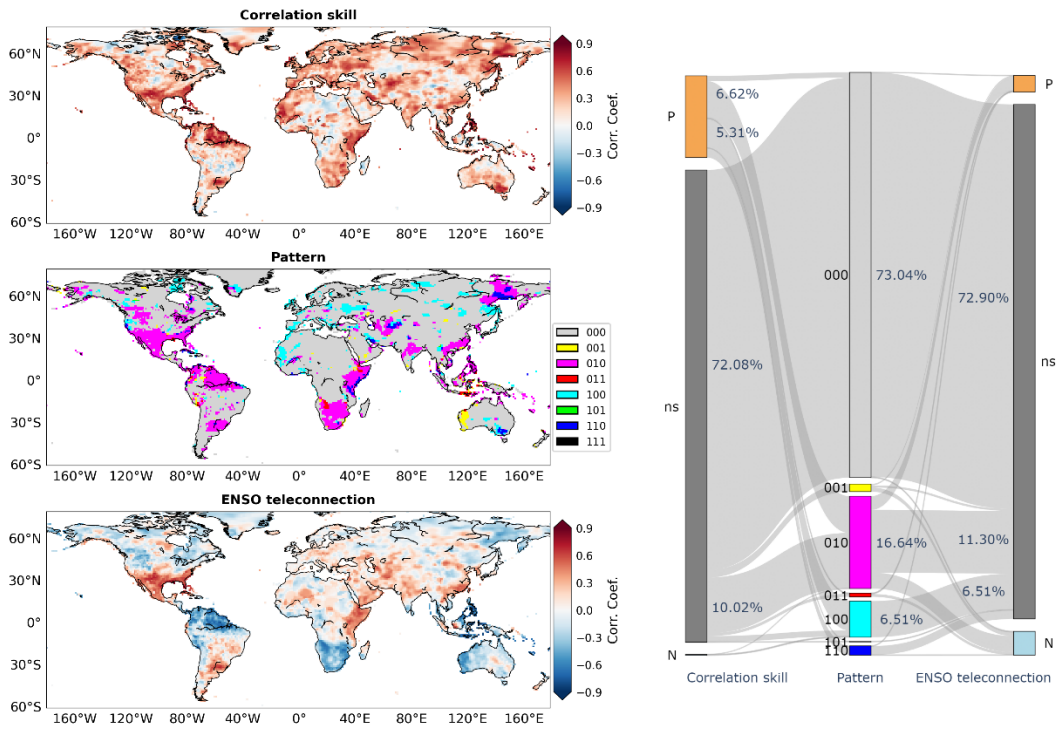

**Figure S14.** As for Figure S1, but for the significance level of 0.01

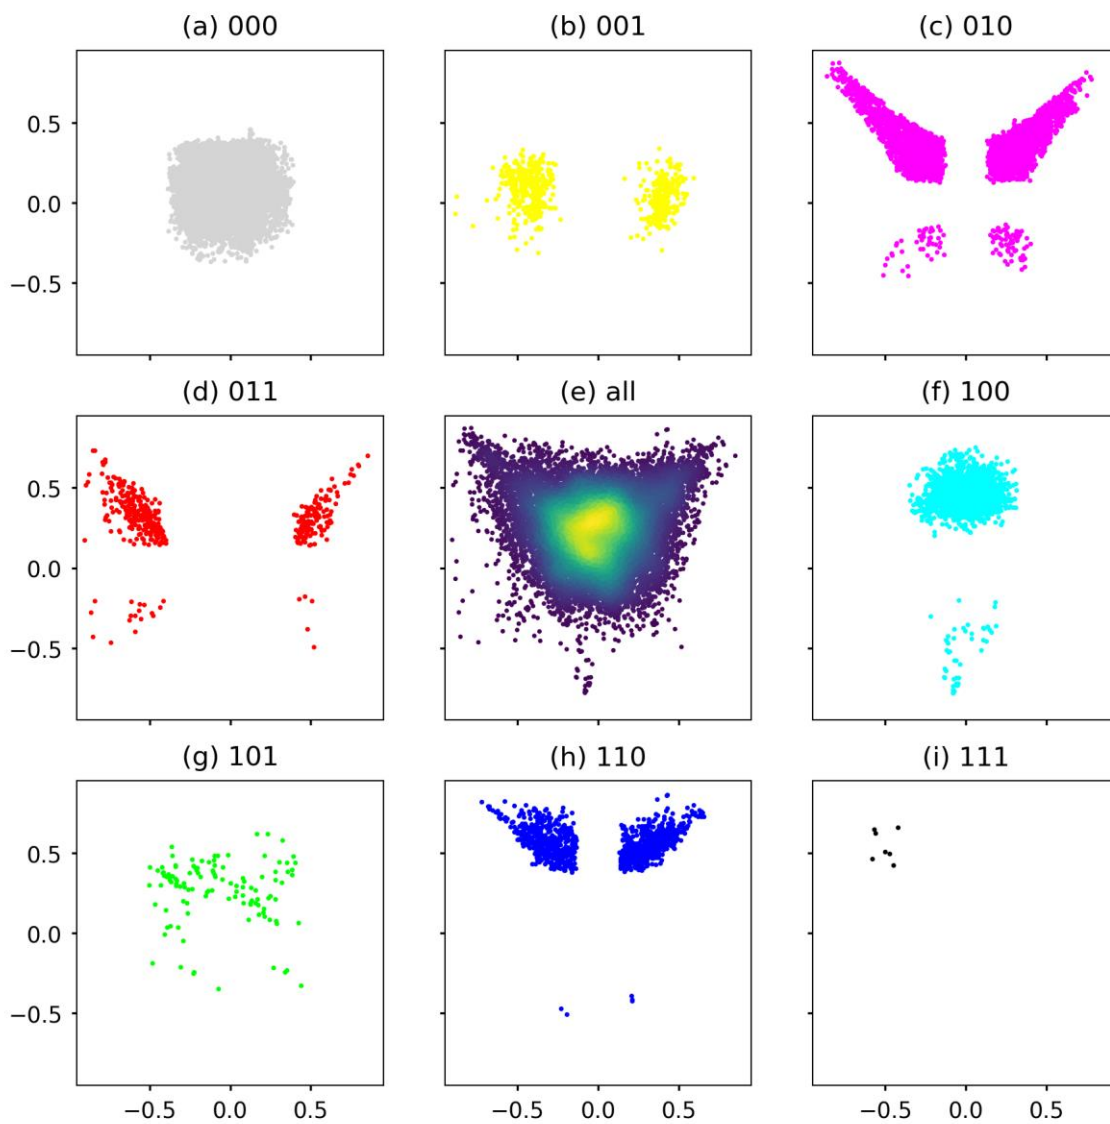

**Figure S15. As for Figure S5, but for the significance level of 0.05**



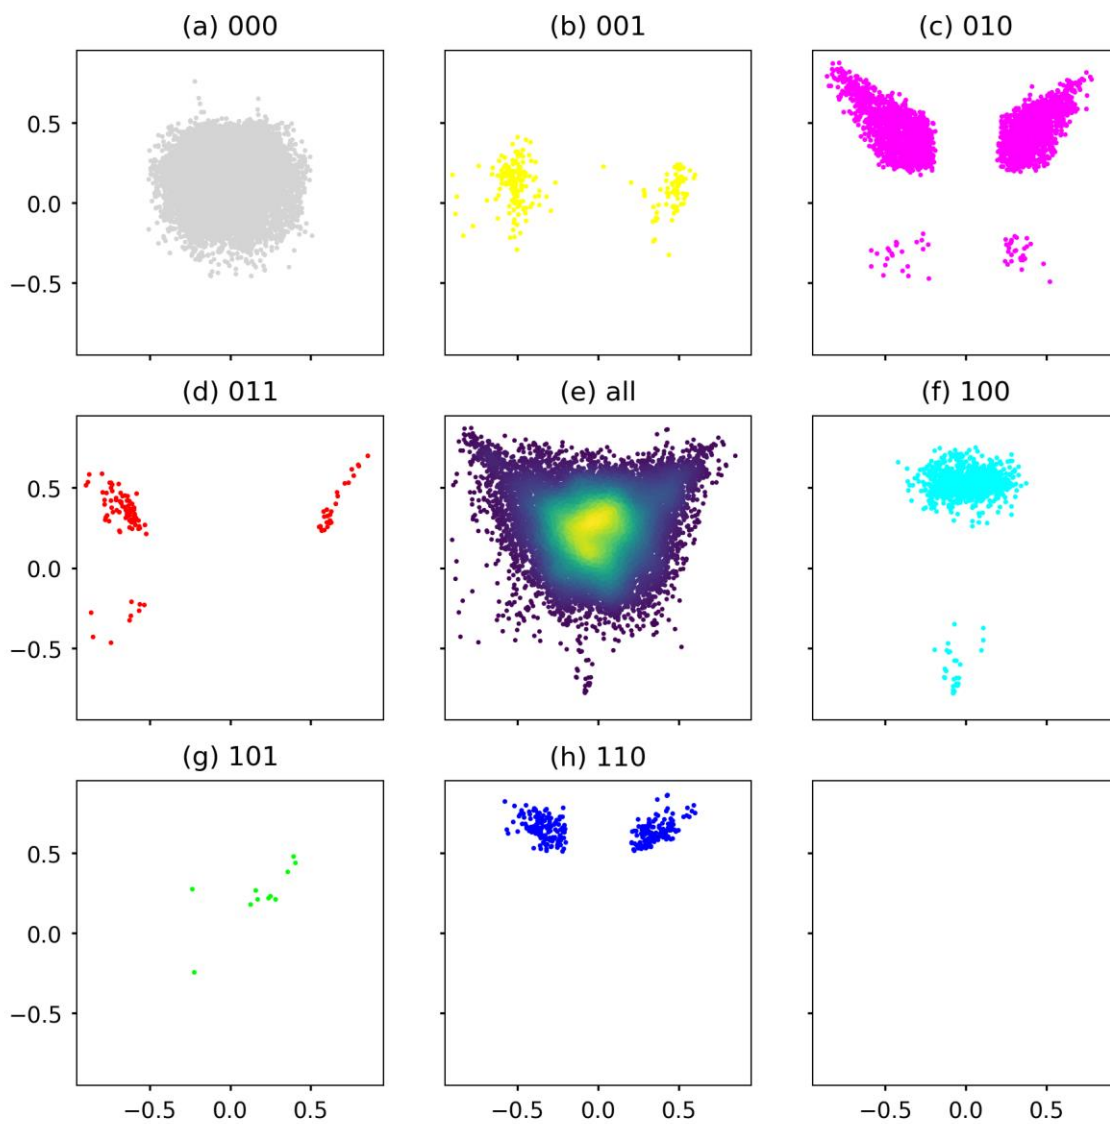

**Figure S16. As for Figure S5, but for the significance level of 0.01**

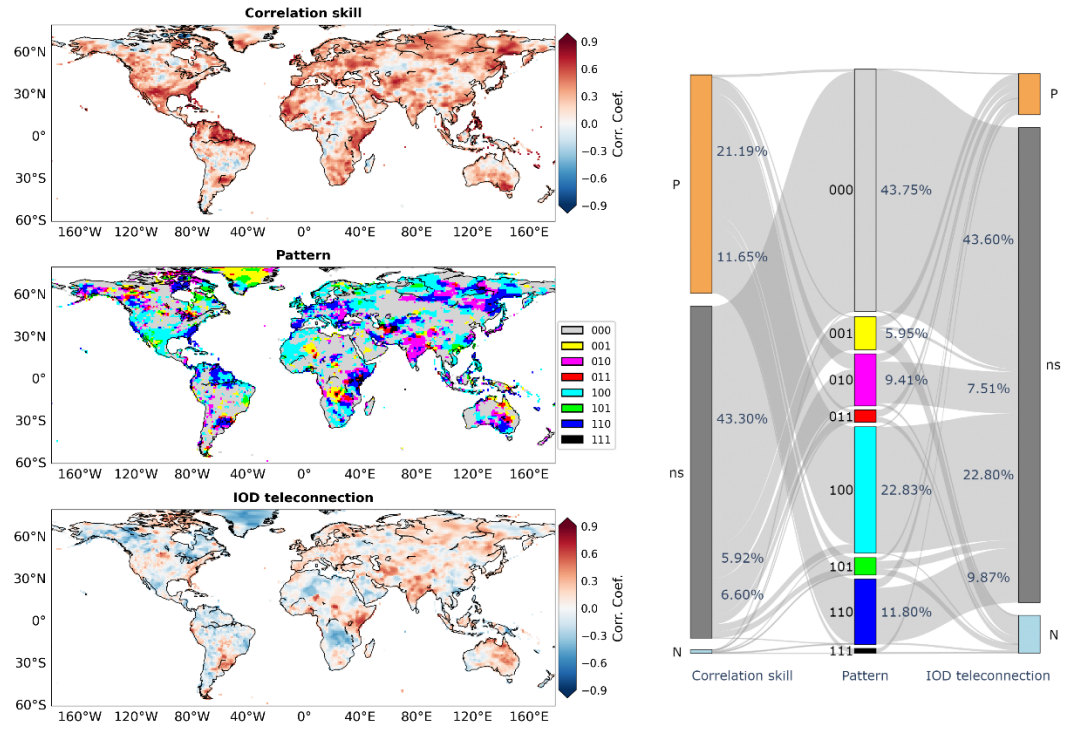

**Figure S17. As for Figure S1, but for IOD in DJF**



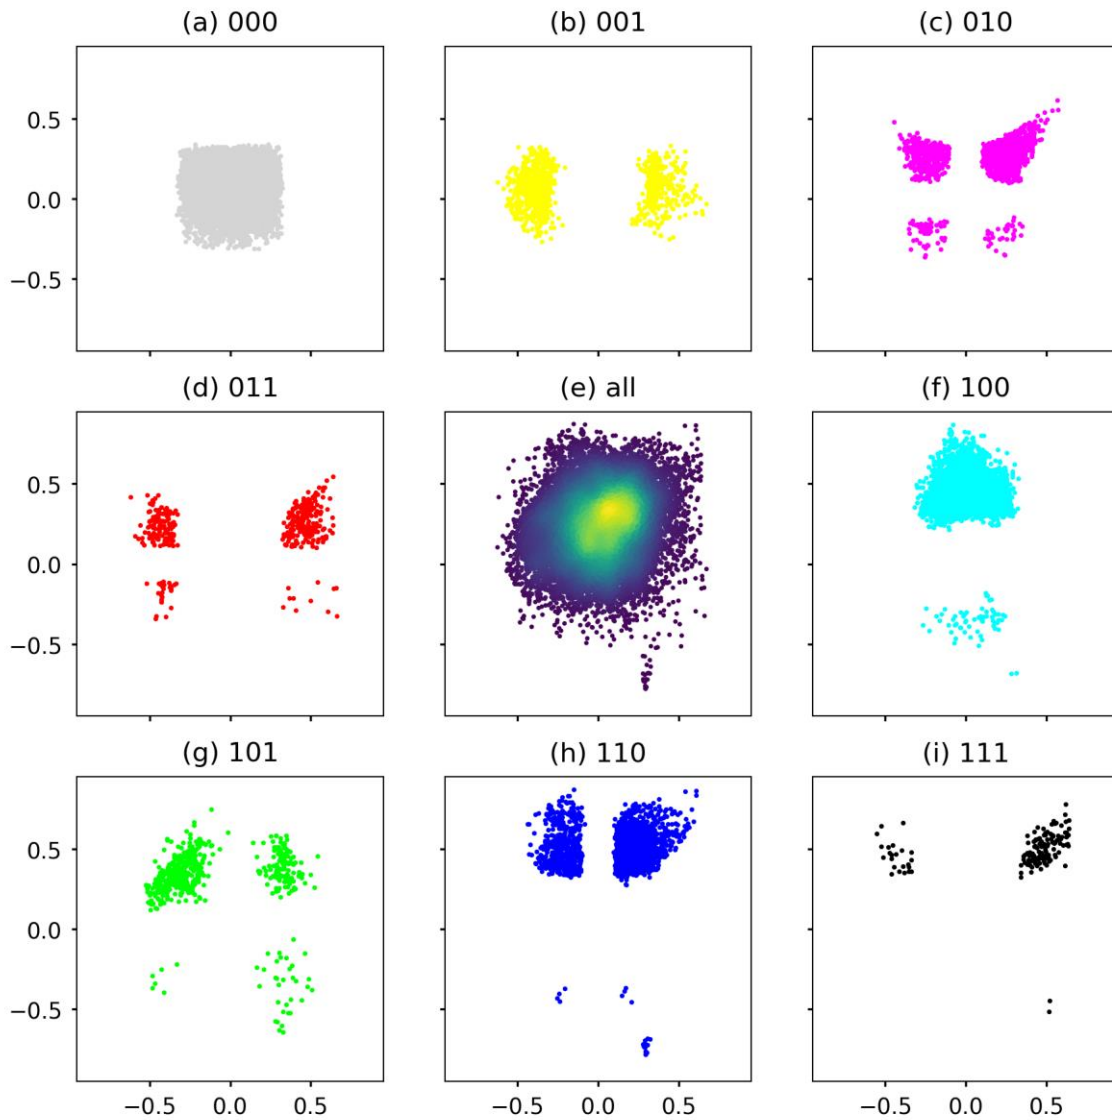

**Figure S18. As for Figure S5, but for IOD in DJF**
